# Supplementary material for: Anti-TNF- αtreatment-related pathways and biomarkers revealed by transcriptome analysis in Chinese psoriasis patients
Source: BMC Syst Biol. 2019 Apr 5;13(Suppl 2):29. doi: 10.1186/s12918-019-0698-7 (PMC6449888; doi:10.1186/s12918-019-0698-7)
Supplement: Supplementary file 1 — Additional Table 1. 176 differential expressed genes (DEGs) between baseline and 12-week after treatment with adjusted p-value <0.05 and 1.55-Fold Change by using paired t-test. (XLSX 20 kb) [file 12918_2019_698_MOESM1_ESM.xlsx]

## Sheet: Supplementary Table 1_176 DEGs
	logFC	pvalue	Padj
CD83	0.977908	9.25433e-07	0.015195
S100A12	-1.39166	3.3455e-06	0.015195
TMEM88	-0.928304	3.46334e-06	0.015195
CYP1B1	-1.1342	3.7241e-06	0.015195
CCNJL	-1.03473	4.14003e-06	0.015195
BRI3P1	-0.838594	4.56375e-06	0.015195
HHEX	-0.776355	7.41745e-06	0.0157542
SULT1B1	-0.986475	7.51399e-06	0.0157542
ANKRD36	0.890239	7.54652e-06	0.0157542
PYGL	-0.999495	7.88616e-06	0.0157542
HPSE	-0.846453	1.09034e-05	0.0198017
SLA	-0.818351	1.30349e-05	0.0216998
LOC730995	1.11346	1.62028e-05	0.0248988
RGS2	-0.867762	1.93644e-05	0.0258546
NDST1	-0.87662	2.06417e-05	0.0258546
RHOB	-0.871799	2.24062e-05	0.0258546
HECW2	-0.767553	2.33969e-05	0.0258546
ACSL1	-0.969156	2.44676e-05	0.0258546
BLOC1S1	-0.902554	2.51431e-05	0.0258546
STAB1	-0.870762	2.66421e-05	0.0258546
LOC648984	-0.781146	2.71786e-05	0.0258546
MAFG	-0.783207	3.16149e-05	0.027276
SLC37A3	-0.895098	3.24375e-05	0.027276
FLJ20273	-0.972933	3.55051e-05	0.027276
LOC347376	-0.650309	3.67126e-05	0.027276
F13A1	-0.815685	3.76725e-05	0.027276
ARHGEF11	-0.759132	3.88893e-05	0.027276
OSCAR	-0.644443	4.06121e-05	0.027276
TLR1	-0.728739	4.06375e-05	0.027276
GK5	0.707822	4.22266e-05	0.027276
DYSF	-0.818034	4.23265e-05	0.027276
LRRC6	-0.678914	4.50524e-05	0.0273611
NQO2	-0.668376	4.51978e-05	0.0273611
CBX8	-0.696365	4.73593e-05	0.0274403
MOSC1	-0.934239	4.93841e-05	0.0274403
DOCK8	-0.640047	5.07216e-05	0.0274403
LOC647450	0.741797	5.0823e-05	0.0274403
FLI1	-0.667087	5.40211e-05	0.0283815
SLC25A44	-0.720016	5.54076e-05	0.0283815
PPP1R3D	-1.03624	6.22285e-05	0.0299971
LOC100134711	0.774035	6.2426e-05	0.0299971
SIPA1L2	-1.093	6.30664e-05	0.0299971
MMP9	-1.12484	6.82279e-05	0.0303431
EVL	0.772134	7.12193e-05	0.0303431
CD6	0.801923	7.15428e-05	0.0303431
LOC653125	0.684734	7.28438e-05	0.0303431
IQGAP1	-0.710347	7.3065e-05	0.0303431
PPP1R12A	-0.705508	7.3084e-05	0.0303431
KLHL2	-0.916974	7.44262e-05	0.0303431
STAG3L1	0.720553	7.92049e-05	0.0315403
ANO10	-0.674196	8.24521e-05	0.0315403
ST3GAL4	-0.82021	8.28787e-05	0.0315403
F2RL1	-0.70926	8.36781e-05	0.0315403
BMX	-0.783063	8.56548e-05	0.0316875
RBP7	-0.75016	8.96551e-05	0.0319829
TPST1	-0.848187	9.54289e-05	0.0321318
CLEC1A	-0.701127	9.99189e-05	0.0325004
MGC15763	0.748111	0.000111425	0.0325004
KCNJ15	-0.936708	0.000111714	0.0325004
DLG4	-0.768699	0.000115748	0.0325004
MSL1	-0.70263	0.000118635	0.0325004
LPAR2	-0.663029	0.000119274	0.0325004
FOSB	1.27736	0.00012111	0.0325004
LOC389286	0.850379	0.000121368	0.0325004
C20orf127	-0.634649	0.000122755	0.0325004
VCAN	-0.763295	0.000123704	0.0325004
LOC642113	0.666353	0.000124007	0.0325004
C7orf53	-0.783123	0.000124158	0.0325004
C19orf35	-0.897004	0.000127561	0.0325004
IDO1	0.971528	0.000129061	0.0325004
ABLIM1	0.668704	0.000130151	0.0325004
SLC11A1	-0.681101	0.000132371	0.0326467
SH3BP5L	-0.855256	0.000138799	0.0335005
RILPL1	-0.731071	0.000139187	0.0335005
PINK1	-0.639124	0.000142524	0.0337407
EXTL3	-0.728098	0.000144754	0.0337407
PKN2	-0.749007	0.000146941	0.0337407
SULF2	-0.770401	0.000150238	0.0338246
SLC26A8	-1.08632	0.000151793	0.0338246
SLC36A1	-0.801562	0.000152386	0.0338246
HSPA1A	-0.880456	0.000155525	0.034142
SLC22A4	-0.666303	0.000158941	0.0345126
NRBF2	-0.663193	0.000172766	0.0361046
ZNF683	0.729024	0.000174218	0.0361046
NTNG2	-0.687828	0.00017489	0.0361046
MANSC1	-0.737313	0.00017637	0.0361046
LPPR2	-0.668441	0.000187067	0.0361046
UBXN2B	-0.714783	0.000188554	0.0361046
ITM2A	0.719118	0.000191988	0.0361046
RBM47	-0.709597	0.000193059	0.0361046
PPP3CC	0.669069	0.000194793	0.0361046
GPR77	-0.682642	0.000194858	0.0361046
TGM3	-1.02235	0.00019909	0.0361046
LOC730278	-0.645555	0.000200521	0.0361046
PPP1R10	-0.644564	0.000201236	0.0361046
EPOR	-0.645346	0.00020627	0.0361046
DIRC2	-0.681694	0.000207752	0.0361046
ITK	0.649276	0.000207924	0.0361046
TACC3	-0.692438	0.000209648	0.0361046
CRIP2	0.732719	0.000213742	0.0362892
ZMYND11	0.68559	0.000219167	0.0364641
ARL11	-0.74991	0.000225811	0.0364641
RNF24	-0.728975	0.00022745	0.0364641
SHKBP1	-0.651121	0.000237908	0.0364641
LOC651612	-1.13481	0.000241378	0.0364641
HCG27	-0.713	0.000242837	0.0364641
CA4	-0.740392	0.000243596	0.0364641
PELO	-0.769175	0.000251052	0.036877
LRFN1	-0.648156	0.000262234	0.0378278
LOC652775	0.734026	0.000263206	0.0378278
LOC653778	-0.806864	0.000271562	0.0378375
FUT7	-0.783221	0.000273025	0.0378375
CLEC5A	-0.847408	0.000273905	0.0378375
ARG1	-1.11885	0.000282801	0.0381853
RFX2	-0.749605	0.000286142	0.0382154
LOC286367	0.648573	0.000286945	0.0382154
CORO1C	-0.778632	0.000292961	0.0385032
SLC24A4	-0.835726	0.000302821	0.0390151
LOC440731	-0.818046	0.000306097	0.0390151
SBNO2	-0.723001	0.000306622	0.0390151
NECAB2	-0.70906	0.000322921	0.0403186
LOC652726	0.928934	0.000334035	0.0404425
B4GALNT4	-0.718425	0.000337297	0.0404518
LOC642103	-0.917193	0.000340633	0.0404518
TMCC3	-0.857172	0.000344283	0.0404573
PLXDC2	-0.782017	0.000356587	0.0415207
MGAM	-0.922521	0.000358831	0.0415207
MIAT	0.77847	0.000359568	0.0415207
DNAJC3	-0.671678	0.000368526	0.0418576
SMA4	0.632776	0.000381162	0.0426785
CLEC2D	0.701022	0.000385345	0.0426785
PARP15	0.653281	0.000396392	0.0432717
LAMA5	0.69592	0.000411581	0.0435651
ZNF217	-0.756962	0.000412714	0.0435651
C13orf18	-0.750299	0.000413854	0.0435651
FOLR3	-1.00077	0.000419171	0.0435651
DNAJC30	0.683704	0.000426389	0.043907
TMEM33	-0.661417	0.000433243	0.0440382
C19orf59	-0.977661	0.000435083	0.0440382
AGPAT9	-0.71913	0.000437482	0.0440382
GPR177	-0.727559	0.000460708	0.044809
FKBP9L	-0.6543	0.000462677	0.044809
ECHDC2	0.782896	0.000465075	0.044809
SMARCD3	-0.868242	0.000486819	0.0453894
F5	-0.733133	0.000497386	0.0455792
KCTD21	-0.649688	0.000516129	0.0460494
LOC642684	-0.92257	0.000516719	0.0460494
CD55	-0.893312	0.000527287	0.0464036
DOK3	-0.796098	0.000546429	0.0471767
PIK3IP1	0.730351	0.000555199	0.0472634
STMN3	0.761145	0.000555985	0.0472634
HSPA1B	-0.979824	0.000564296	0.047588
ERF	-0.679231	0.000568717	0.047588
NFIB	-0.637585	0.00057088	0.047588
PHLPP1	-0.663765	0.000575117	0.0476023
BCORL1	-0.640852	0.00057665	0.0476023
LOC652493	0.723704	0.000598133	0.048181
CD2	0.732751	0.000612126	0.0489138
PAPSS2	-0.63977	0.000621737	0.0492603
ZNF697	-0.660832	0.000652298	0.0492603
RAB36	-0.688349	0.000659242	0.0492603
PGLYRP1	-0.778427	0.00066196	0.0492603
RPL12P6	0.714374	0.000682124	0.0492603
SLAMF6	0.648305	0.000684003	0.0492603
P2RX5	0.745239	0.000685011	0.0492603
SNORD104	0.762807	0.000690564	0.0492603
MEG3	0.837429	0.000696757	0.0492603
VHL	0.633926	0.000708378	0.0494763
NMI	-0.713797	0.00072648	0.0495087
HSPA7	-0.697821	0.000738858	0.0495087
KIAA1026	-0.930137	0.000744458	0.0495087
LOC100133840	0.948815	0.000746464	0.0495087
CACNA1I	0.700694	0.000769733	0.0495087
NLRC4	-0.825167	0.000775866	0.0495087
ZNF792	0.648243	0.000802039	0.049877
LOC648710	-0.697943	0.00080675	0.0498961
