# Supplementary material for: Anti-TNF- αtreatment-related pathways and biomarkers revealed by transcriptome analysis in Chinese psoriasis patients
Source: BMC Syst Biol. 2019 Apr 5;13(Suppl 2):29. doi: 10.1186/s12918-019-0698-7 (PMC6449888; doi:10.1186/s12918-019-0698-7)
Supplement: Supplementary file 2 — Additional Table 2. The details of co-expression modules generated from WGCNA, where 13 modules that are significantly positive-correlated with treatment (correlation coefficient > 0.5, p-value < 0.05); and 9 modules that are significantly negative-correlated with treatment (correlation coefficient < -0.5, p-value < 0.05). (XLSX 375 kb) [file 12918_2019_698_MOESM2_ESM.xlsx]

## Sheet: Supplementary Table 2_sigmodule
	cor	Pvalue
MEgreen	0.733432	0.00663658
MEblue	0.728857	0.00716493
MEorange4	0.701879	0.0109477
MEsalmon2	0.69735	0.011705
MEfloralwhite	0.692208	0.0126111
MEdarkorange	0.661762	0.0190773
MEchocolate4	0.644369	0.0237107
MElightskyblue3	0.638744	0.02537
MEmediumpurple4	0.628057	0.028752
MEorange	0.620398	0.0313677
MEorangered3	0.602052	0.0383221
MEpink1	0.589832	0.0435234
MEdarkolivegreen1	0.581063	0.0475507
MEorangered1	-0.590941	0.0430316
MEcornsilk	-0.603488	0.0377417
MElightpink3	-0.639161	0.0252442
MEperu	-0.640039	0.0249807
MEantiquewhite3	-0.673173	0.0164218
MEplum1	-0.701179	0.0110624
MEpurple	-0.71692	0.00869213
MEwhite	-0.730948	0.00691961
MEmediumorchid	-0.731887	0.0068116

## Sheet: Gene_Module
Genes	Module
A1BG	firebrick4
A26C3	tan3
A2LD1	brown2
A3GALT2	indianred4
A4GNT	lightblue
AAA1	brown4
AAAS	plum3
AACS	darkseagreen
AACSL	lightpink1
AADACL1	darkseagreen4
AADAT	indianred4
AAGAB	brown2
AAK1	seashell4
AAMP	orange2
AARS	slateblue3
AARS2	slateblue3
AARSD1	slateblue3
AASDH	slateblue3
AASDHPPT	royalblue2
AASS	indianred
AATF	orange3
AATK	purple
ABAT	paleturquoise4
ABCA1	blanchedalmond
ABCA10	antiquewhite
ABCA11	navajowhite1
ABCA2	paleturquoise4
ABCA5	palevioletred3
ABCA6	firebrick4
ABCA7	plum4
ABCA9	purple
ABCB1	mediumorchid4
ABCB10	brown1
ABCB11	plum
ABCB4	slateblue3
ABCB6	mediumpurple4
ABCB7	skyblue2
ABCB8	tan2
ABCB9	dodgerblue3
ABCC1	yellow3
ABCC10	salmon1
ABCC13	pink
ABCC2	thistle
ABCC3	darkseagreen3
ABCC4	lightskyblue2
ABCC5	sienna
ABCC6	aliceblue
ABCC6P1	honeydew
ABCC6P2	honeydew
ABCC9	tan1
ABCD1	slateblue3
ABCD3	indianred4
ABCD4	ivory
ABCE1	slateblue3
ABCF1	slateblue3
ABCF2	slateblue3
ABCF3	lightblue1
ABCG1	firebrick4
ABCG4	firebrick4
ABCG5	aliceblue
ABCG8	navajowhite
ABHD1	plum
ABHD10	chocolate1
ABHD11	wheat1
ABHD12	deeppink1
ABHD12B	honeydew
ABHD13	orange3
ABHD14A	slateblue3
ABHD14B	deeppink1
ABHD15	purple
ABHD2	purple
ABHD3	slateblue3
ABHD4	purple
ABHD5	slateblue3
ABHD6	darkgoldenrod1
ABHD7	slateblue3
ABHD8	mediumorchid4
ABI1	plum2
ABI2	plum
ABI3	black
ABL1	salmon2
ABL2	mediumorchid3
ABLIM1	slateblue3
ABLIM3	mediumpurple4
ABP1	magenta4
ABR	magenta4
ABT1	firebrick4
ABTB1	purple
ABTB2	darkmagenta
ACAA1	orangered
ACAA2	mediumpurple3
ACACA	antiquewhite1
ACACB	skyblue
ACAD10	firebrick4
ACAD11	slateblue3
ACAD8	darkseagreen
ACAD9	paleturquoise
ACADM	white
ACADS	mistyrose
ACADSB	darkviolet
ACADVL	indianred3
ACAP1	orangered3
ACAP2	slateblue3
ACAT1	slateblue3
ACAT2	slateblue3
ACBD3	mediumorchid
ACBD4	palevioletred1
ACBD5	mediumpurple
ACBD6	chocolate2
ACCN3	firebrick4
ACCS	darkseagreen3
ACD	slateblue3
ACE2	pink4
ACER2	darkseagreen2
ACER3	burlywood
ACHE	brown4
ACIN1	lightskyblue1
ACLY	paleturquoise4
ACN9	darkseagreen
ACO1	mediumorchid2
ACO2	chocolate2
ACOT1	antiquewhite
ACOT11	darkmagenta
ACOT2	floralwhite
ACOT4	slateblue3
ACOT7	mediumorchid4
ACOT8	red1
ACOT9	slateblue3
ACOX1	chocolate2
ACOX2	lightcyan
ACOX3	orangered
ACP1	purple
ACP2	lightblue3
ACP5	sienna1
ACP6	lightcyan
ACPL2	navajowhite3
ACPP	lightskyblue2
ACPT	slateblue3
ACRBP	lightgoldenrodyellow
ACRC	mediumorchid3
ACSBG1	firebrick4
ACSF2	darkmagenta
ACSF3	royalblue2
ACSL1	slateblue3
ACSL3	slateblue3
ACSL4	slateblue3
ACSL5	brown1
ACSL6	slateblue3
ACSM3	darkorange
ACSM5	rosybrown4
ACSS1	slateblue3
ACSS2	palevioletred3
ACSS3	khaki4
ACTA2	orange3
ACTB	lightpink1
ACTG1	lightskyblue1
ACTL6A	slateblue3
ACTL8	orange4
ACTN1	purple
ACTN4	mediumpurple
ACTR10	green1
ACTR1A	slateblue3
ACTR1B	slateblue3
ACTR2	grey60
ACTR3	slateblue3
ACTR3B	slateblue3
ACTR5	slateblue3
ACTR6	purple
ACTR8	darkolivegreen2
ACTRT1	violet
ACVR1	floralwhite
ACVR1B	lavenderblush1
ACVR2A	plum4
ACVRL1	mediumpurple3
ACY1	lightpink
ACYP1	slateblue3
ACYP2	tan1
ADA	slateblue3
ADAL	slateblue3
ADAM10	slateblue3
ADAM12	maroon
ADAM15	darkgoldenrod3
ADAM17	slateblue3
ADAM19	slateblue3
ADAM2	green2
ADAM28	navajowhite3
ADAM29	maroon
ADAM30	indianred
ADAM32	blanchedalmond
ADAM33	mediumpurple
ADAM3A	indianred1
ADAM5	darkolivegreen4
ADAM6	darkorange2
ADAM7	brown4
ADAM8	indianred1
ADAM9	slateblue3
ADAMDEC1	blue2
ADAMTS1	brown3
ADAMTS13	tan2
ADAMTS15	orangered1
ADAMTS17	tan2
ADAMTS18	green4
ADAMTS2	lightgoldenrodyellow
ADAMTS3	indianred4
ADAMTS6	pink2
ADAMTS8	thistle2
ADAMTSL2	lightcyan
ADAMTSL3	pink
ADAMTSL4	floralwhite
ADAMTSL5	tomato2
ADAP1	plum1
ADAP2	navajowhite2
ADAR	slateblue3
ADARB1	blue
ADARB2	indianred2
ADAT1	tomato4
ADAT3	indianred
ADCK1	darkgoldenrod4
ADCK2	purple
ADCK4	sienna2
ADCK5	coral3
ADCY3	darkorange2
ADCY4	slateblue3
ADCY5	lightpink2
ADCY6	brown2
ADCY7	sienna
ADCY9	mediumorchid4
ADD1	lightpink2
ADD2	dodgerblue4
ADD3	lightskyblue2
ADH5	pink2
ADHFE1	paleturquoise
ADIPOQ	orangered1
ADIPOR1	purple
ADIPOR2	midnightblue
ADK	lightcyan
ADM	slateblue3
ADM2	lightcyan
ADNP	hotpink4
ADNP2	indianred4
ADO	indianred3
ADORA1	coral1
ADORA2A	thistle2
ADORA2B	mediumorchid
ADORA3	darkmagenta
ADPGK	sienna4
ADPRH	lavenderblush2
ADPRHL1	plum2
ADPRHL2	salmon2
ADRA1A	chocolate4
ADRA2A	yellowgreen
ADRA2B	chocolate1
ADRB1	firebrick4
ADRB2	darkseagreen2
ADRBK1	lightpink
ADRM1	lavender
ADSL	purple
ADSS	lightpink2
ADSSL1	lightskyblue1
AEBP1	slateblue3
AEBP2	lightsteelblue
AEN	whitesmoke
AES	slateblue3
AFAP1	darkmagenta
AFAP1L1	darkviolet
AFAP1L2	purple
AFARP1	brown
AFF1	slateblue3
AFF3	tan1
AFF4	firebrick3
AFG3L1	yellow
AFG3L2	slateblue3
AFMID	plum1
AFP	tan1
AFTPH	lightpink
AGA	dodgerblue4
AGAP1	plum
AGAP2	indianred4
AGAP3	slateblue3
AGAP6	orange2
AGAP7	palevioletred
AGAP8	salmon4
AGBL2	brown4
AGBL3	darkolivegreen4
AGBL5	navajowhite1
AGER	mediumpurple
AGFG1	lightcyan
AGFG2	slateblue3
AGGF1	plum
AGK	slateblue3
AGL	orangered3
AGMAT	chocolate4
AGPAT1	darkorange
AGPAT2	slateblue3
AGPAT3	skyblue3
AGPAT4	mediumorchid4
AGPAT5	lightcyan
AGPAT6	purple
AGPAT9	purple
AGPS	dodgerblue3
AGR2	red
AGR3	indianred4
AGRN	indianred
AGRP	firebrick4
AGTPBP1	slateblue3
AGTR1	skyblue3
AGTRAP	slateblue3
AGXT2L2	lightblue2
AHCTF1	lightyellow
AHCY	sienna1
AHCYL1	lightskyblue1
AHCYL2	indianred3
AHDC1	royalblue3
AHI1	lightsteelblue1
AHNAK	lightsteelblue1
AHR	slateblue3
AHSA1	lightskyblue1
AHSA2	firebrick4
AHSP	lightskyblue1
AICDA	burlywood
AIDA	slateblue3
AIF1	mediumpurple3
AIF1L	whitesmoke
AIFM1	lightslateblue
AIFM2	skyblue
AIFM3	orange2
AIG1	skyblue1
AIM1	lightgreen
AIM1L	darkorange2
AIM2	pink
AIMP2	paleturquoise4
AIP	brown3
AIPL1	cornsilk2
AIRE	slateblue3
AJAP1	skyblue
AK1	slateblue3
AK2	rosybrown4
AK2P2	lavenderblush1
AK3	slateblue3
AK3L1	wheat3
AK5	purple
AKAP10	sienna3
AKAP11	purple
AKAP12	purple2
AKAP13	slateblue3
AKAP14	royalblue3
AKAP2	pink2
AKAP3	tan2
AKAP7	slateblue3
AKAP8	slateblue3
AKAP8L	orangered1
AKIRIN1	lightskyblue1
AKIRIN2	slateblue3
AKNA	peru
AKNAD1	yellowgreen
AKR1A1	purple
AKR1B1	slateblue3
AKR1C2	coral2
AKR1C3	mediumorchid4
AKR1C4	darkseagreen1
AKR1CL1	chocolate3
AKR1D1	darkseagreen3
AKR7A2	slateblue3
AKR7A3	powderblue
AKT1	palevioletred
AKT1S1	thistle1
AKT2	palevioletred2
AKT3	magenta3
AKTIP	paleturquoise4
ALAD	magenta1
ALAS1	mediumorchid
ALAS2	lightgreen
ALB	plum1
ALCAM	chocolate3
ALDH16A1	lavenderblush3
ALDH18A1	mediumorchid4
ALDH1A1	thistle
ALDH1A2	saddlebrown
ALDH1B1	mediumorchid4
ALDH1L2	floralwhite
ALDH2	navajowhite2
ALDH3A2	paleturquoise4
ALDH3B1	slateblue3
ALDH4A1	darkseagreen3
ALDH5A1	slateblue3
ALDH6A1	royalblue
ALDH7A1	coral4
ALDH8A1	whitesmoke
ALDH9A1	pink
ALDOA	slateblue3
ALDOB	paleturquoise4
ALDOC	red1
ALG1	sienna
ALG10	slateblue3
ALG10B	mediumorchid3
ALG11	thistle4
ALG12	plum
ALG13	slateblue3
ALG14	lightsteelblue1
ALG2	lightskyblue4
ALG3	purple
ALG5	slateblue2
ALG6	tan4
ALG8	slateblue3
ALG9	purple
ALK	mistyrose
ALKBH1	darkseagreen3
ALKBH2	slateblue3
ALKBH3	slateblue3
ALKBH4	firebrick
ALKBH5	pink
ALKBH6	slateblue3
ALKBH7	lightcyan1
ALKBH8	deeppink1
ALMS1	slateblue3
ALMS1P	lightblue1
ALOX12	lightgoldenrodyellow
ALOX12P2	brown4
ALOX15	darkmagenta
ALOX15B	ivory
ALOX5	slateblue3
ALOX5AP	slateblue3
ALOXE3	lightslateblue
ALPK1	slateblue3
ALPK2	darkolivegreen4
ALPL	slateblue3
ALPP	honeydew1
ALPPL2	slateblue3
ALS2	coral3
ALS2CL	tan2
ALS2CR12	lightskyblue2
ALS2CR14	lightskyblue1
ALS2CR16	slateblue3
ALS2CR4	slateblue3
ALS2CR8	white
ALX1	palevioletred2
ALX3	green4
AMAC1	lightcyan
AMAC1L2	slateblue3
AMAC1L3	lightpink
AMACR	saddlebrown
AMBN	cyan
AMBP	orange4
AMBRA1	lightpink4
AMD1	slateblue3
AMDHD1	tomato
AMDHD2	skyblue4
AMELY	slateblue3
AMFR	linen
AMICA1	purple
AMIGO1	brown4
AMMECR1	indianred1
AMMECR1L	seashell4
AMN	indianred
AMN1	indianred4
AMOT	slateblue3
AMOTL2	slateblue3
AMPD2	deeppink
AMPD3	darkmagenta
AMT	blue
AMY1A	green1
AMY1B	lightskyblue4
AMY1C	lightblue
AMY2A	tomato4
AMY2B	thistle4
AMZ2	orange4
ANAPC1	lightcyan
ANAPC10	purple
ANAPC11	cornflowerblue
ANAPC13	tomato2
ANAPC2	firebrick
ANAPC4	purple
ANAPC5	slateblue3
ANAPC7	brown2
ANG	floralwhite
ANGEL1	darkgreen
ANGEL2	slateblue3
ANGPT1	grey60
ANGPTL3	mediumpurple1
ANGPTL4	lightskyblue4
ANGPTL6	blueviolet
ANK1	brown2
ANK3	thistle
ANKAR	palevioletred1
ANKDD1A	indianred2
ANKFY1	mediumpurple
ANKH	palevioletred1
ANKHD1	peru
ANKHD1-EIF4EBP3	purple
ANKIB1	salmon2
ANKLE2	cyan
ANKMY1	midnightblue
ANKMY2	saddlebrown
ANKRA2	orange2
ANKRD1	linen
ANKRD10	skyblue1
ANKRD11	tomato2
ANKRD12	sienna1
ANKRD13A	chocolate3
ANKRD13C	slateblue3
ANKRD13D	orangered4
ANKRD16	slateblue3
ANKRD17	slateblue3
ANKRD18A	coral1
ANKRD20A1	paleturquoise
ANKRD20A3	pink4
ANKRD20B	thistle1
ANKRD22	pink
ANKRD23	slateblue3
ANKRD24	royalblue
ANKRD26	lightsteelblue
ANKRD27	salmon4
ANKRD28	slateblue3
ANKRD29	darksalmon
ANKRD30B	chocolate2
ANKRD32	mediumorchid2
ANKRD33	slateblue3
ANKRD34A	lightsteelblue
ANKRD34B	slateblue3
ANKRD34C	wheat3
ANKRD35	aliceblue
ANKRD36	slateblue3
ANKRD36B	seashell4
ANKRD37	orange4
ANKRD38	tan2
ANKRD39	slateblue3
ANKRD40	slateblue3
ANKRD41	mistyrose4
ANKRD43	purple2
ANKRD44	palevioletred2
ANKRD46	lightblue2
ANKRD47	ivory
ANKRD49	palevioletred
ANKRD50	navajowhite2
ANKRD52	antiquewhite1
ANKRD53	wheat1
ANKRD54	firebrick4
ANKRD55	plum4
ANKRD57	sienna4
ANKRD58	firebrick4
ANKRD6	lightblue2
ANKRD7	coral3
ANKRD9	darkgrey
ANKS1A	slateblue3
ANKS1B	orangered
ANKS3	wheat3
ANKZF1	mediumorchid3
ANO1	lightslateblue
ANO10	slateblue3
ANO6	paleturquoise3
ANO7	slateblue3
ANO8	darkolivegreen4
ANO9	slateblue3
ANP32A	tomato
ANP32B	slateblue3
ANP32C	slateblue3
ANP32E	deeppink1
ANPEP	purple
ANRIL	palevioletred
ANTXR1	slateblue3
ANTXR2	slateblue3
ANXA1	lightskyblue2
ANXA10	darkgrey
ANXA11	plum1
ANXA2	tan4
ANXA2P1	plum1
ANXA2P2	firebrick
ANXA3	lightcyan
ANXA5	deeppink2
ANXA6	chocolate4
ANXA7	antiquewhite3
AOAH	blueviolet
AOC2	slateblue3
AOC3	indianred3
AOF2	darkolivegreen1
AP1B1	steelblue
AP1G1	paleturquoise3
AP1G2	coral
AP1GBP1	thistle4
AP1M1	indianred
AP1M2	slateblue3
AP1S1	plum2
AP1S2	orange2
AP2A1	purple
AP2A2	lightskyblue1
AP2B1	lightskyblue1
AP2M1	brown2
AP2S1	lightslateblue
AP3B1	turquoise
AP3D1	deeppink
AP3M1	slateblue3
AP3M2	slateblue3
AP3S1	floralwhite
AP3S2	slateblue3
AP4B1	purple
AP4E1	green2
AP4M1	dodgerblue4
AP4S1	salmon2
APAF1	slateblue3
APBA2	coral2
APBA2BP	antiquewhite4
APBA3	plum1
APBB1	firebrick
APBB1IP	purple
APBB3	tomato4
APC	darkseagreen1
APCDD1	orangered
APEG1	darkseagreen2
APEH	black
APEX1	slateblue3
APEX2	lightskyblue1
APH1A	plum1
APH1B	purple
API5	purple
APIP	pink2
APITD1	navajowhite
APLN	magenta3
APLP1	darkmagenta
APLP2	lightgreen
APM-1	brown
APOA1	tan3
APOA1BP	slateblue3
APOB48R	slateblue3
APOBEC3A	black
APOBEC3C	darkseagreen
APOBEC3D	yellow
APOBEC3F	palevioletred2
APOBEC3G	purple
APOBEC3H	mediumorchid4
APOC1	lightcyan
APOC2	tan
APOC4	plum
APOL1	coral
APOL2	antiquewhite3
APOL3	darkseagreen2
APOL4	thistle
APOL6	pink
APOLD1	orange
APOM	black
APOO	pink3
APOOL	oldlace
APP	slateblue3
APPBP2	lightslateblue
APPL1	whitesmoke
APPL2	white
APRIN	indianred4
APRT	slateblue3
APTX	magenta2
AQP1	black
AQP10	lightgoldenrodyellow
AQP11	mediumorchid4
AQP12A	slateblue3
AQP12B	skyblue
AQP3	coral4
AQP7P1	lavenderblush1
AQP7P2	sienna2
AQP9	slateblue3
AQR	dodgerblue4
AR	blanchedalmond
ARAF	lightcyan
ARAP1	white
ARAP2	indianred4
ARAP3	lightyellow
ARCN1	purple
ARD1A	tan4
ARF1	skyblue4
ARF3	khaki4
ARF4	purple2
ARF5	wheat1
ARF6	coral3
ARFGAP1	orange3
ARFGAP2	slateblue3
ARFGAP3	navajowhite
ARFGEF1	purple
ARFGEF2	chocolate1
ARFIP1	lightskyblue1
ARFIP2	orange2
ARFRP1	brown3
ARG1	mediumorchid4
ARG2	lightcyan
ARG99	salmon1
ARGLU1	slateblue3
ARHGAP1	coral2
ARHGAP10	darkgoldenrod3
ARHGAP11A	yellow4
ARHGAP11B	mediumorchid
ARHGAP12	darkgreen
ARHGAP15	lightslateblue
ARHGAP17	chocolate2
ARHGAP19	purple
ARHGAP20	tan1
ARHGAP21	salmon
ARHGAP22	skyblue1
ARHGAP23	slateblue3
ARHGAP24	navajowhite
ARHGAP25	lightblue3
ARHGAP26	lightsteelblue1
ARHGAP27	purple
ARHGAP28	mistyrose4
ARHGAP30	slateblue3
ARHGAP4	slateblue3
ARHGAP5	darkgoldenrod1
ARHGAP6	darkorange2
ARHGAP8	darkolivegreen4
ARHGAP9	chocolate3
ARHGDIA	lightskyblue1
ARHGDIB	purple
ARHGDIG	skyblue4
ARHGEF1	sienna4
ARHGEF10	orange3
ARHGEF10L	lightslateblue
ARHGEF11	purple
ARHGEF12	darkolivegreen4
ARHGEF16	slateblue1
ARHGEF18	coral
ARHGEF19	slateblue3
ARHGEF2	lightcyan
ARHGEF3	purple
ARHGEF5L	lightpink1
ARHGEF6	darkorange
ARHGEF7	darkturquoise
ARHGEF9	slateblue3
ARID1A	lightcoral
ARID2	darkolivegreen4
ARID3A	purple
ARID3B	chocolate2
ARID4A	coral
ARID4B	oldlace
ARID5A	slateblue3
ARID5B	mediumpurple3
ARIH1	deeppink1
ARIH2	slateblue3
ARL1	slateblue3
ARL11	green
ARL13A	tomato4
ARL15	dodgerblue3
ARL16	magenta
ARL17B	lightcyan
ARL17P1	mediumorchid
ARL2	navajowhite
ARL2BP	chocolate4
ARL3	dodgerblue4
ARL4A	salmon
ARL4C	slateblue3
ARL4D	tan4
ARL5A	royalblue
ARL5B	darkred
ARL6	royalblue3
ARL6IP1	sienna2
ARL6IP4	violet
ARL6IP5	royalblue2
ARL6IP6	plum4
ARL8B	slateblue3
ARMC1	lightpink4
ARMC10	tan2
ARMC2	orangered1
ARMC5	black
ARMC6	lightskyblue1
ARMC7	slateblue3
ARMC8	lightskyblue1
ARMC9	darkolivegreen4
ARMCX1	lightpink4
ARMCX2	slateblue3
ARMCX3	tan1
ARMCX4	salmon1
ARMCX5	thistle
ARMCX6	black
ARMET	chocolate3
ARNT	slateblue3
ARNTL	lightcyan1
ARP11	steelblue
ARPC1A	darkgoldenrod3
ARPC1B	tan4
ARPC2	navajowhite
ARPC3	slateblue3
ARPC4	lightskyblue1
ARPC5	purple
ARPC5L	wheat1
ARPM2	grey60
ARPP19	chocolate2
ARR3	tan1
ARRB1	blue1
ARRB2	slateblue3
ARRDC1	sienna4
ARRDC2	salmon2
ARRDC3	steelblue
ARRDC4	firebrick4
ARRDC5	slateblue3
ARS2	chocolate4
ARSA	slateblue3
ARSB	thistle1
ARSD	pink
ARSG	moccasin
ARSJ	plum
ARSK	slateblue3
ART1	palevioletred3
ARV1	navajowhite
ARVCF	slateblue3
ARVP6125	mediumorchid3
AS3MT	salmon4
ASAH1	lightskyblue1
ASAH2C	darkolivegreen
ASAP1	purple
ASAP1IT1	lightsteelblue1
ASAP2	chocolate2
ASAP3	lavenderblush
ASB1	black
ASB11	cornsilk
ASB13	darkgoldenrod4
ASB17	slateblue2
ASB2	darkmagenta
ASB3	sienna1
ASB4	orangered4
ASB5	deepskyblue
ASB6	lightpink2
ASB7	paleturquoise4
ASB8	purple
ASCC1	antiquewhite3
ASCC2	slateblue3
ASCC3	pink3
ASCL2	slateblue3
ASCL5	lavenderblush3
ASF1A	floralwhite
ASF1B	floralwhite
ASFMR1	orangered3
ASGR1	navajowhite2
ASGR2	mediumorchid
ASH1L	indianred4
ASH2L	firebrick2
ASL	darkseagreen1
ASMTL	antiquewhite3
ASNA1	tan1
ASNS	red1
ASNSD1	orange3
ASPH	skyblue1
ASPHD1	indianred1
ASPHD2	pink
ASPM	yellow
ASPRV1	slateblue3
ASPSCR1	paleturquoise4
ASRGL1	tan2
ASS1	purple
ASTE1	indianred1
ASTL	lightskyblue2
ASTN2	dodgerblue4
ASXL1	pink
ASXL2	sienna1
ASZ1	tan2
ATAD1	lightsteelblue
ATAD2	lightskyblue1
ATAD2B	pink4
ATAD3A	lightskyblue1
ATAD3C	tan1
ATE1	blue1
ATF1	deeppink1
ATF2	lightskyblue1
ATF3	lightpink2
ATF4	salmon2
ATF5	lightpink2
ATF6	slateblue3
ATF6B	linen
ATF7	lightslateblue
ATF7IP	paleturquoise4
ATF7IP2	slateblue3
ATG10	tan2
ATG12	lavender
ATG16L1	slateblue3
ATG16L2	purple
ATG2A	purple
ATG2B	whitesmoke
ATG3	slateblue3
ATG4A	darkgoldenrod4
ATG4B	mediumorchid2
ATG4C	pink
ATG4D	thistle2
ATG5	purple2
ATG7	slateblue3
ATG9A	purple
ATHL1	mediumpurple3
ATIC	slateblue3
ATL1	tan2
ATL2	lavenderblush
ATL3	slateblue3
ATM	lightpink2
ATMIN	pink1
ATN1	lightpink
ATOH7	slateblue3
ATOX1	lightcyan1
ATP10A	oldlace
ATP11A	lightcyan
ATP11B	navajowhite
ATP11C	royalblue
ATP12A	slateblue
ATP13A1	royalblue2
ATP13A2	darkgoldenrod4
ATP13A3	brown1
ATP1A1	slateblue3
ATP1A3	brown3
ATP1B1	dodgerblue3
ATP1B2	antiquewhite1
ATP1B3	blueviolet
ATP2A1	slateblue3
ATP2A2	mediumpurple2
ATP2A3	mediumpurple
ATP2B1	firebrick4
ATP2B3	indianred4
ATP2B4	midnightblue
ATP2C1	lightpink
ATP2C2	red
ATP5A1	purple
ATP5B	purple
ATP5C1	coral1
ATP5D	slateblue3
ATP5E	chocolate2
ATP5EP2	chocolate2
ATP5F1	chocolate2
ATP5G1	slateblue3
ATP5G2	chocolate2
ATP5G3	darkseagreen3
ATP5H	greenyellow
ATP5I	lightskyblue1
ATP5J	slateblue3
ATP5J2	lightcyan1
ATP5L	sienna4
ATP5O	slateblue3
ATP5S	darkgoldenrod4
ATP5SL	mistyrose
ATP6AP1	paleturquoise
ATP6AP1L	slateblue3
ATP6AP2	salmon4
ATP6V0A1	firebrick3
ATP6V0A2	darkorange
ATP6V0B	plum1
ATP6V0C	lightgreen
ATP6V0D1	orangered
ATP6V0D2	firebrick4
ATP6V0E1	purple
ATP6V0E2	slateblue3
ATP6V1A	sienna
ATP6V1B1	indianred4
ATP6V1B2	slateblue3
ATP6V1C1	brown1
ATP6V1D	slateblue3
ATP6V1E1	lightblue4
ATP6V1E2	dodgerblue4
ATP6V1F	slateblue3
ATP6V1G1	slateblue3
ATP6V1G2	firebrick
ATP6V1H	slateblue3
ATP7A	slateblue3
ATP7B	purple
ATP8A1	lightslateblue
ATP8A2	darkolivegreen4
ATP8B2	sienna2
ATP8B4	mediumpurple3
ATP9A	pink2
ATP9B	coral4
ATPAF1	slateblue3
ATPAF2	orange3
ATPBD1B	slateblue3
ATPBD3	slateblue3
ATPBD4	paleturquoise
ATPGD1	slateblue3
ATPIF1	blue1
ATR	slateblue3
ATRIP	slateblue3
ATRN	darkolivegreen2
ATRX	chocolate2
ATXN1	slateblue3
ATXN10	lightcyan1
ATXN1L	indianred4
ATXN2	pink
ATXN2L	lightcoral
ATXN3	violet
ATXN7L1	purple
ATXN7L2	slateblue3
ATXN7L3	yellow4
AUH	firebrick4
AUP1	antiquewhite
AURKA	lavenderblush1
AURKAIP1	tan1
AURKAPS1	firebrick3
AURKB	darkgoldenrod3
AURKC	green1
AUTS2	mediumorchid4
AVIL	slateblue3
AVL9	slateblue3
AVP	steelblue
AVPI1	indianred2
AVPR2	mediumorchid4
AXIN1	lightslateblue
AXIN2	slateblue3
AXL	lightpink2
AXUD1	lightskyblue2
AYP1p1	coral1
AZI1	tan3
AZI2	slateblue3
AZIN1	slateblue3
AZU1	palevioletred
B2M	magenta2
B3GALNT1	lightblue3
B3GALNT2	cornsilk
B3GALT1	pink4
B3GALT2	skyblue1
B3GALT4	midnightblue
B3GALT6	paleturquoise4
B3GALTL	darkorange
B3GAT1	mediumpurple3
B3GAT3	slateblue3
B3GNT1	lightcyan1
B3GNT2	lightskyblue1
B3GNT3	brown
B3GNT4	tan2
B3Gn-T6	lightcyan
B3GNT6	dodgerblue4
B3GNT8	purple
B3GNT9	lightblue
B3GNTL1	purple
B4GALNT3	darkolivegreen4
B4GALNT4	purple
B4GALT1	slateblue3
B4GALT2	saddlebrown
B4GALT3	skyblue1
B4GALT4	darkseagreen
B4GALT5	slateblue3
B4GALT7	slateblue3
B9D1	red
B9D2	purple
BAALC	honeydew1
BACE1	mediumorchid4
BACE2	aliceblue
BACH1	slateblue3
BACH2	skyblue4
BAD	skyblue4
BAG1	ivory
BAG3	moccasin
BAG4	slateblue3
BAG5	lightsteelblue
BAGE	plum
BAGE2	paleturquoise4
BAGE3	indianred4
BAGE4	pink4
BAGE5	paleturquoise4
BAHCC1	royalblue2
BAHD1	lightskyblue1
BAI1	darkgoldenrod1
BAIAP2	lightsteelblue1
BAIAP2L2	palevioletred3
BAIAP3	brown3
BAK1	plum2
BAMBI	maroon
BANF1	tomato2
BANF2	lightblue
BANK1	coral
BANP	deeppink
BAP1	mediumpurple
BARD1	lightskyblue1
BASP1	purple
BAT1	tan1
BAT2	white
BAT2D1	tomato
BAT2L	lavenderblush2
BAT3	green3
BAT4	navajowhite
BAT5	paleturquoise3
BATF	blue1
BATF2	pink
BATF3	orange2
BAX	wheat1
BAZ1A	slateblue3
BAZ1B	slateblue3
BAZ2A	chocolate2
BAZ2B	slateblue3
BBC3	slateblue3
BBS1	whitesmoke
BBS10	blanchedalmond
BBS12	lightpink2
BBS2	slateblue3
BBS4	navajowhite
BBS5	plum
BBS7	deeppink2
BBS9	slateblue3
BBX	thistle4
BCAN	darkred
BCAP29	sienna4
BCAP31	lightskyblue1
BCAS2	navajowhite2
BCAS3	plum1
BCAS4	slateblue3
BCAT1	steelblue
BCAT2	slateblue3
BCCIP	red
BCDIN3D	firebrick2
BCKDHA	lightslateblue
BCKDHB	slateblue3
BCKDK	orange3
BCL10	slateblue3
BCL11A	darkgoldenrod4
BCL11B	slateblue3
BCL2	slateblue3
BCL2A1	slateblue3
BCL2L1	blue1
BCL2L11	orangered4
BCL2L12	brown3
BCL2L13	darkseagreen1
BCL2L14	palevioletred3
BCL2L15	purple
BCL2L2	plum
BCL3	slateblue2
BCL6	slateblue3
BCL7A	tan1
BCL7B	cyan
BCL7C	deepskyblue
BCL9	darkgoldenrod4
BCL9L	slateblue3
BCLAF1	deeppink2
BCOR	plum
BCORL1	purple
BCORL2	deeppink2
BCR	mediumpurple3
BCS1L	slateblue3
BCYRN1	slateblue3
BDH1	purple
BDKRB2	green2
BDNF	firebrick2
BDP1	paleturquoise3
BEAN	lightcyan
BECN1	darksalmon
BEGAIN	skyblue3
BEND2	orange
BEND3	darkolivegreen4
BEND4	tan2
BEND5	palevioletred1
BEND7	slateblue3
BEST1	slateblue3
BEST2	lightblue3
BEST4	lightsteelblue1
BET1	chocolate1
BET1L	slateblue3
BEX1	palevioletred
BEX2	slateblue3
BEX4	slateblue3
BEX5	red1
BEXL1	slateblue3
BFAR	orange2
BFSP1	mediumorchid4
BGLAP	yellow4
BHLHB2	darkorange
BHLHB9	lightcyan
BHMT	darkolivegreen4
BICD1	lightblue4
BICD2	cornsilk
BID	purple
BIK	slateblue3
BIN1	slateblue3
BIN3	hotpink4
BIRC1	indianred4
BIRC2	antiquewhite
BIRC3	paleturquoise4
BIRC5	mediumorchid3
BIRC6	sienna1
BIRC7	indianred4
BIVM	slateblue3
BLCAP	lightcoral
BLID	paleturquoise
BLK	palevioletred1
BLM	antiquewhite1
BLMH	orangered
BLOC1S1	plum1
BLOC1S2	lightcyan1
BLR1	orangered4
BLVRA	navajowhite2
BLVRB	mediumpurple3
BLZF1	chocolate2
BMF	orange2
BMI1	slateblue3
BMP1	dodgerblue3
BMP2	chocolate2
BMP2K	darkgoldenrod3
BMP2KL	lightpink4
BMP4	dodgerblue3
BMP6	navajowhite
BMPR1A	slateblue3
BMPR1B	lightblue3
BMPR2	indianred4
BMS1	slateblue3
BMS1P5	chocolate2
BMX	slateblue3
BNC1	grey60
BNC2	maroon
BNIP1	deepskyblue
BNIP2	deeppink1
BNIP3	navajowhite2
BNIP3L	skyblue2
BNIPL	lightcyan1
BOAT	pink2
BOK	yellow3
BOLA1	antiquewhite
BOLA2	lightskyblue1
BOLA2B	cornflowerblue
BOLA3	slateblue3
BOLL	darkseagreen
BOP1	slateblue3
BP75	honeydew1
BPESC1	salmon1
BPGM	orange3
BPHL	lavenderblush3
BPI	palevioletred
BPNT1	sienna2
BPTF	turquoise
BPY2B	skyblue
BRAF	red
BRCA1	sienna1
BRCC3	plum3
BRD1	antiquewhite
BRD2	thistle1
BRD3	lavenderblush1
BRD4	lightpink
BRD7	navajowhite2
BRD7P2	skyblue3
BRD7P3	darksalmon
BRD8	purple
BRD9	navajowhite
BRE	indianred
BRF1	paleturquoise4
BRF2	saddlebrown
BRI3	slateblue3
BRI3BP	darkmagenta
BRI3P1	darkorange
BRIX1	slateblue3
BRMS1	orange3
BRMS1L	orange3
BRP44	pink3
BRP44L	darkorange2
BRPF1	orange3
BRPF3	orangered4
BRSK1	slateblue3
BRSK2	mediumpurple1
BRUNOL4	palevioletred3
BRUNOL6	darkorange
BRWD1	darkgoldenrod1
BRWD2	slateblue3
BRWD3	seashell4
BSCL2	lightpink3
BSDC1	lightpink4
BSG	white
BSPH1	slateblue
BSPRY	sienna3
BST1	slateblue3
BST2	pink
BTAF1	slateblue3
BTBD1	tan4
BTBD10	purple
BTBD11	slateblue3
BTBD12	salmon
BTBD15	paleturquoise4
BTBD17	lightblue3
BTBD2	salmon2
BTBD3	darkslateblue
BTBD6	slateblue3
BTBD7	bisque4
BTBD8	orangered4
BTBD9	darkturquoise
BTD	chocolate3
BTF3	slateblue3
BTF3L4	white
BTG1	lightslateblue
BTG2	slateblue3
BTG3	blue1
BTK	slateblue3
BTLA	navajowhite3
BTN2A1	lightskyblue1
BTN2A2	cyan
BTN3A1	green3
BTN3A2	green3
BTN3A3	hotpink4
BTNL3	orange3
BTNL8	salmon
BTRC	slateblue3
BUB1B	magenta3
BUB3	pink3
BUD13	paleturquoise
BUD31	dodgerblue3
BVES	powderblue
BYSL	darkgoldenrod1
BZRAP1	cornsilk2
BZRPL1	orange3
BZW1	deeppink2
BZW2	slateblue3
C10orf104	saddlebrown
C10orf105	slateblue3
C10orf11	navajowhite2
C10orf110	orangered
C10orf114	darkgoldenrod1
C10orf118	antiquewhite1
C10orf119	slateblue3
C10orf12	navajowhite
C10orf120	indianred4
C10orf125	brown3
C10orf128	coral4
C10orf137	coral4
C10orf141	lightcyan
C10orf18	slateblue3
C10orf2	slateblue3
C10orf21	plum
C10orf26	lightpink4
C10orf28	tomato4
C10orf32	navajowhite
C10orf33	darkmagenta
C10orf35	lightskyblue1
C10orf39	honeydew
C10orf4	palevioletred2
C10orf46	lightskyblue1
C10orf47	plum2
C10orf50	cyan
C10orf51	indianred
C10orf54	lightsteelblue1
C10orf57	antiquewhite4
C10orf58	darkgrey
C10orf59	thistle3
C10orf6	slateblue3
C10orf61	sienna3
C10orf64	firebrick4
C10orf72	palevioletred2
C10orf73	yellow2
C10orf75	orange3
C10orf76	darkolivegreen1
C10orf78	plum1
C10orf79	wheat3
C10orf84	darkorange2
C11orf1	slateblue3
C11orf10	slateblue3
C11orf17	sienna3
C11orf2	slateblue3
C11orf20	pink4
C11orf21	mediumorchid4
C11orf24	chocolate2
C11orf30	dodgerblue3
C11orf31	slateblue3
C11orf35	salmon1
C11orf41	thistle3
C11orf44	coral
C11orf46	lightyellow
C11orf47	slateblue3
C11orf48	orangered4
C11orf49	antiquewhite1
C11orf51	yellow4
C11orf52	plum
C11orf54	slateblue3
C11orf55	slateblue3
C11orf57	floralwhite
C11orf58	lightskyblue1
C11orf59	slateblue3
C11orf60	lightblue2
C11orf61	purple
C11orf63	darkgrey
C11orf67	maroon
C11orf68	rosybrown4
C11orf71	orange
C11orf73	magenta4
C11orf74	orange2
C11orf75	navajowhite2
C11orf76	powderblue
C11orf80	slateblue3
C11orf82	slateblue3
C11orf83	antiquewhite
C11orf84	indianred3
C12orf10	slateblue3
C12orf11	wheat1
C12orf24	lightblue1
C12orf26	lightblue3
C12orf28	lightblue3
C12orf29	slateblue3
C12orf30	salmon2
C12orf31	darkturquoise
C12orf32	paleturquoise4
C12orf35	slateblue3
C12orf37	purple2
C12orf4	dodgerblue4
C12orf40	darkseagreen
C12orf41	slateblue3
C12orf43	orangered4
C12orf44	lightslateblue
C12orf45	lightcyan
C12orf47	slateblue3
C12orf48	tomato
C12orf49	yellow3
C12orf5	royalblue
C12orf50	indianred4
C12orf51	cornsilk2
C12orf52	deeppink1
C12orf57	slateblue3
C12orf60	skyblue3
C12orf62	steelblue
C12orf64	tan2
C12orf65	darkseagreen
C12orf66	mediumorchid4
C12orf67	aliceblue
C12orf68	orange3
C12orf69	peru
C12orf73	mediumpurple1
C12orf76	antiquewhite3
C12orf77	midnightblue
C13orf1	paleturquoise4
C13orf15	slateblue3
C13orf16	royalblue3
C13orf18	purple
C13orf23	palevioletred3
C13orf25	cornsilk2
C13orf27	sienna4
C13orf31	slateblue3
C13orf34	slateblue3
C13orf36	mediumorchid3
C13orf37	yellow4
C13orf7	blue3
C14orf1	tan2
C14orf100	rosybrown4
C14orf101	slateblue3
C14orf102	purple
C14orf104	navajowhite1
C14orf105	lightcyan
C14orf106	lightcyan
C14orf109	skyblue3
C14orf112	slateblue3
C14orf115	linen
C14orf118	navajowhite2
C14orf121	skyblue2
C14orf124	lightcyan
C14orf126	thistle3
C14orf129	magenta1
C14orf131	lightskyblue2
C14orf132	navajowhite3
C14orf133	indianred4
C14orf135	darkseagreen2
C14orf138	slateblue3
C14orf139	darkseagreen1
C14orf142	floralwhite
C14orf143	slateblue3
C14orf144	dodgerblue3
C14orf145	honeydew
C14orf147	blueviolet
C14orf149	purple
C14orf153	navajowhite4
C14orf156	paleturquoise4
C14orf159	purple
C14orf162	slateblue3
C14orf166	slateblue3
C14orf166B	darkgrey
C14orf167	orangered4
C14orf169	slateblue3
C14orf173	red1
C14orf174	palevioletred3
C14orf176	lightblue3
C14orf178	burlywood
C14orf179	paleturquoise4
C14orf181	slateblue3
C14orf184	tan1
C14orf2	chocolate2
C14orf21	blue3
C14orf28	slateblue3
C14orf32	salmon4
C14orf39	aliceblue
C14orf4	lightyellow
C14orf43	darkred
C14orf45	purple
C14orf48	antiquewhite1
C14orf49	lightcoral
C14orf64	purple
C14orf68	sienna4
C14orf72	mediumpurple3
C14orf78	plum1
C14orf80	purple
C14orf82	sienna4
C14orf85	chocolate2
C14orf93	lightpink
C15orf17	chocolate3
C15orf2	darkseagreen1
C15orf20	tan1
C15orf21	plum
C15orf23	slateblue3
C15orf24	paleturquoise4
C15orf28	navajowhite
C15orf29	navajowhite
C15orf32	rosybrown4
C15orf38	pink2
C15orf39	palevioletred3
C15orf40	yellow2
C15orf41	lightpink
C15orf43	peru
C15orf44	lightskyblue4
C15orf48	dodgerblue4
C15orf52	sienna4
C15orf54	turquoise
C15orf57	firebrick4
C15orf59	skyblue3
C15orf60	pink4
C15orf62	midnightblue
C15orf63	chocolate2
C16orf13	slateblue2
C16orf30	slateblue3
C16orf33	slateblue3
C16orf35	lightsteelblue1
C16orf38	firebrick4
C16orf42	plum
C16orf45	salmon1
C16orf47	green4
C16orf48	mediumpurple
C16orf5	slateblue3
C16orf50	indianred1
C16orf52	black
C16orf53	floralwhite
C16orf54	magenta4
C16orf55	turquoise
C16orf56	ivory
C16orf57	slateblue3
C16orf58	slateblue3
C16orf61	purple
C16orf62	plum
C16orf63	green3
C16orf67	slateblue3
C16orf68	saddlebrown
C16orf7	slateblue3
C16orf70	antiquewhite3
C16orf72	slateblue3
C16orf74	antiquewhite
C16orf75	indianred3
C16orf78	dodgerblue3
C16orf79	mediumpurple
C16orf80	coral1
C16orf86	navajowhite3
C16orf87	peru
C16orf88	lightcyan
C16orf91	deeppink2
C16orf93	coral3
C17orf100	blueviolet
C17orf101	lightyellow
C17orf102	tan2
C17orf103	purple
C17orf106	antiquewhite1
C17orf108	brown3
C17orf28	darkgoldenrod4
C17orf37	skyblue2
C17orf38	darkmagenta
C17orf39	slateblue3
C17orf41	pink2
C17orf42	antiquewhite2
C17orf44	chocolate2
C17orf45	slateblue3
C17orf46	mistyrose4
C17orf47	darkgoldenrod4
C17orf48	yellow4
C17orf49	slateblue3
C17orf51	green1
C17orf53	purple2
C17orf55	linen
C17orf56	slateblue3
C17orf58	navajowhite4
C17orf59	black
C17orf60	black
C17orf61	slateblue3
C17orf62	floralwhite
C17orf63	lightgreen
C17orf64	darkmagenta
C17orf65	lightblue2
C17orf66	slateblue3
C17orf67	lightpink2
C17orf68	pink
C17orf69	slateblue3
C17orf70	slateblue3
C17orf71	slateblue3
C17orf74	navajowhite3
C17orf75	firebrick3
C17orf76	honeydew1
C17orf78	tan
C17orf79	slateblue3
C17orf80	deepskyblue
C17orf81	slateblue3
C17orf82	grey60
C17orf85	mistyrose3
C17orf87	orange2
C17orf88	lightpink4
C17orf89	whitesmoke
C17orf90	slateblue3
C17orf91	darkseagreen2
C17orf93	tan1
C17orf95	skyblue4
C17orf96	mediumpurple
C17orf97	cornsilk2
C18orf1	lightblue4
C18orf10	paleturquoise4
C18orf19	slateblue3
C18orf2	tan1
C18orf20	darkorange2
C18orf21	slateblue3
C18orf22	slateblue3
C18orf25	brown2
C18orf26	plum4
C18orf45	lavender
C18orf54	coral4
C18orf55	lightcyan
C18orf8	paleturquoise4
C19orf10	darkolivegreen
C19orf12	palevioletred3
C19orf16	slateblue
C19orf2	slateblue3
C19orf20	lightcoral
C19orf21	tomato
C19orf22	purple
C19orf24	lightcyan1
C19orf25	green1
C19orf26	orangered1
C19orf28	lavenderblush
C19orf29	cornsilk2
C19orf29OS	antiquewhite3
C19orf30	salmon1
C19orf31	indianred4
C19orf33	thistle1
C19orf35	white
C19orf36	salmon4
C19orf38	darkgoldenrod3
C19orf39	lightskyblue2
C19orf40	chocolate1
C19orf42	indianred3
C19orf43	salmon
C19orf45	darkolivegreen4
C19orf46	green1
C19orf47	indianred
C19orf48	slateblue3
C19orf50	orangered1
C19orf52	plum
C19orf53	slateblue3
C19orf54	palevioletred3
C19orf56	slateblue3
C19orf57	pink4
C19orf59	slateblue3
C19orf6	black
C19orf60	blueviolet
C19orf61	blue3
C19orf62	slateblue3
C19orf63	lightblue
C19orf64	sienna
C19orf66	indianred3
C19orf70	slateblue3
C19orf71	mediumorchid3
C1GALT1	darkslateblue
C1GALT1C1	lightpink3
C1orf101	bisque4
C1orf103	tomato
C1orf104	lightpink3
C1orf106	pink
C1orf107	darkseagreen
C1orf108	lightblue2
C1orf109	mediumorchid4
C1orf112	blue1
C1orf113	darkseagreen4
C1orf115	cornsilk2
C1orf116	dodgerblue3
C1orf120	lightpink2
C1orf122	royalblue
C1orf123	lightcyan
C1orf124	powderblue
C1orf125	pink4
C1orf128	slateblue3
C1orf131	royalblue2
C1orf138	navajowhite
C1orf144	lightskyblue1
C1orf146	yellowgreen
C1orf149	lightblue1
C1orf150	darkseagreen1
C1orf151	deeppink1
C1orf156	darkgreen
C1orf159	lightcyan
C1orf161	slateblue3
C1orf162	darkolivegreen
C1orf163	skyblue3
C1orf165	navajowhite3
C1orf166	chocolate4
C1orf167	slateblue3
C1orf170	firebrick4
C1orf172	tan1
C1orf174	navajowhite
C1orf175	aliceblue
C1orf177	ivory
C1orf183	lightskyblue1
C1orf186	pink4
C1orf187	cornsilk2
C1orf188	orangered3
C1orf189	plum
C1orf19	slateblue3
C1orf190	tomato4
C1orf192	pink2
C1orf194	black
C1orf198	salmon4
C1orf200	darkseagreen
C1orf201	mediumpurple3
C1orf203	coral1
C1orf204	peru
C1orf21	mediumorchid4
C1orf212	mediumorchid2
C1orf215	lightgoldenrodyellow
C1orf216	lightslateblue
C1orf218	slateblue3
C1orf222	plum
C1orf226	skyblue
C1orf229	darkolivegreen4
C1orf24	navajowhite
C1orf25	pink
C1orf26	purple
C1orf27	green4
C1orf31	orangered4
C1orf35	lightpink3
C1orf38	slateblue3
C1orf41	slateblue3
C1orf43	slateblue3
C1orf50	slateblue3
C1orf52	slateblue3
C1orf53	sienna1
C1orf54	lightslateblue
C1orf55	slateblue3
C1orf56	slateblue3
C1orf57	thistle3
C1orf58	lightslateblue
C1orf59	midnightblue
C1orf61	slateblue3
C1orf63	firebrick4
C1orf65	mediumorchid3
C1orf66	chocolate2
C1orf69	chocolate3
C1orf70	slateblue3
C1orf71	slateblue3
C1orf74	lightskyblue2
C1orf77	slateblue3
C1orf81	slateblue3
C1orf83	navajowhite3
C1orf84	magenta4
C1orf85	pink2
C1orf86	turquoise
C1orf88	dodgerblue4
C1orf9	darkseagreen1
C1orf91	slateblue3
C1orf92	plum4
C1orf93	burlywood
C1orf95	skyblue3
C1orf96	green1
C1orf97	skyblue3
C1orf99	indianred4
C1QA	deeppink2
C1QB	lightblue4
C1QBP	slateblue3
C1QC	coral4
C1QL2	plum2
C1QL3	firebrick3
C1QTNF3	antiquewhite2
C1QTNF6	cyan
C1QTNF7	lightcyan
C1R	orangered4
C1RL	white
C1S	plum
C2	navajowhite2
C20orf100	darkorange
C20orf103	yellow4
C20orf106	ivory
C20orf107	orangered4
C20orf108	indianred4
C20orf11	pink
C20orf111	paleturquoise4
C20orf112	pink
C20orf114	lightskyblue4
C20orf117	indianred3
C20orf12	plum
C20orf127	floralwhite
C20orf134	lightyellow
C20orf141	lightblue3
C20orf165	skyblue2
C20orf177	coral
C20orf191	lightblue1
C20orf194	plum
C20orf196	plum
C20orf197	lightskyblue2
C20orf199	slateblue3
C20orf20	slateblue3
C20orf24	slateblue3
C20orf27	lightslateblue
C20orf29	slateblue3
C20orf3	slateblue3
C20orf30	slateblue3
C20orf4	slateblue3
C20orf43	blue
C20orf45	firebrick4
C20orf51	palevioletred
C20orf52	coral
C20orf55	indianred2
C20orf62	cyan
C20orf7	maroon
C20orf71	khaki4
C20orf72	darkmagenta
C20orf85	paleturquoise3
C20orf86	yellowgreen
C20orf94	palevioletred3
C21orf119	mistyrose3
C21orf121	plum
C21orf122	plum
C21orf124	deeppink1
C21orf126	slateblue3
C21orf128	honeydew
C21orf136	tan2
C21orf2	slateblue3
C21orf24	pink3
C21orf30	deeppink2
C21orf33	purple
C21orf34	orangered1
C21orf37	darksalmon
C21orf45	dodgerblue3
C21orf49	magenta1
C21orf51	brown4
C21orf55	antiquewhite3
C21orf56	wheat1
C21orf57	saddlebrown
C21orf58	slateblue3
C21orf59	slateblue3
C21orf62	aliceblue
C21orf63	mediumpurple3
C21orf66	white
C21orf7	dodgerblue4
C21orf70	pink4
C21orf71	darkolivegreen2
C21orf81	chocolate2
C21orf84	tan2
C21orf89	slateblue3
C21orf91	maroon
C21orf96	slateblue3
C22orf13	pink3
C22orf25	sienna2
C22orf27	slateblue3
C22orf28	purple
C22orf29	navajowhite1
C22orf30	steelblue
C22orf32	slateblue3
C22orf33	green1
C22orf34	indianred4
C22orf36	darkolivegreen2
C22orf37	thistle3
C22orf39	slateblue3
C22orf40	paleturquoise4
C22orf43	red
C22orf9	deeppink2
C2CD2	purple
C2CD2L	darkgoldenrod1
C2CD3	mediumorchid3
C2CD4C	firebrick4
C2orf15	palevioletred
C2orf16	magenta4
C2orf18	tan3
C2orf21	darkolivegreen4
C2orf24	royalblue
C2orf25	lightskyblue1
C2orf27B	indianred
C2orf28	slateblue3
C2orf29	slateblue3
C2orf3	pink
C2orf30	tan4
C2orf32	lightsteelblue
C2orf34	slateblue3
C2orf37	pink
C2orf40	slateblue3
C2orf42	navajowhite2
C2orf43	lightskyblue2
C2orf44	darkseagreen
C2orf47	lightpink2
C2orf48	orangered3
C2orf49	slateblue3
C2orf50	tan1
C2orf53	pink4
C2orf54	dodgerblue4
C2orf55	tomato4
C2orf56	antiquewhite
C2orf62	tan1
C2orf63	tan2
C2orf64	slateblue3
C2orf67	lightslateblue
C2orf68	skyblue
C2orf69	navajowhite4
C2orf7	darkseagreen4
C2orf71	slateblue1
C2orf76	mistyrose4
C2orf77	orangered4
C2orf78	darkolivegreen4
C2orf79	lightslateblue
C2orf82	darkgrey
C2orf86	mediumorchid
C2orf89	slateblue3
C3	mediumpurple4
C3AR1	firebrick
C3orf1	honeydew1
C3orf10	lavenderblush3
C3orf14	lightpink2
C3orf15	salmon1
C3orf16	lightcyan
C3orf17	honeydew1
C3orf18	navajowhite1
C3orf19	indianred1
C3orf21	navajowhite2
C3orf22	orange2
C3orf23	darkseagreen2
C3orf24	orangered
C3orf25	lightcyan
C3orf26	purple2
C3orf27	firebrick4
C3orf30	tan2
C3orf31	slateblue3
C3orf34	slateblue3
C3orf36	wheat1
C3orf37	palevioletred1
C3orf38	slateblue3
C3orf39	chocolate4
C3orf41	darkorange2
C3orf42	slateblue3
C3orf45	deeppink2
C3orf46	darkseagreen1
C3orf50	tan1
C3orf52	yellowgreen
C3orf54	slateblue2
C3orf58	maroon
C3orf59	lightslateblue
C3orf60	palevioletred
C3orf62	slateblue3
C3orf63	darksalmon
C3orf64	tan2
C3orf67	tan2
C3orf70	mediumorchid3
C3orf71	slateblue3
C3orf75	slateblue3
C4A	darkviolet
C4BPA	darkseagreen2
C4orf10	mediumorchid2
C4orf11	pink
C4orf12	greenyellow
C4orf14	slateblue3
C4orf18	navajowhite2
C4orf23	orange4
C4orf27	lightpink4
C4orf29	floralwhite
C4orf3	orange4
C4orf32	slateblue3
C4orf33	lightskyblue2
C4orf34	lightsteelblue
C4orf35	lightpink2
C4orf37	lightskyblue2
C4orf39	lightcyan
C4orf40	palevioletred2
C4orf41	tan4
C4orf42	coral2
C4orf46	chocolate4
C4orf48	thistle4
C4orf49	mistyrose4
C4orf50	indianred2
C4orf51	firebrick4
C5	maroon
C5AR1	purple
C5orf13	orange2
C5orf15	orange2
C5orf20	blue
C5orf21	moccasin
C5orf22	firebrick4
C5orf24	tomato4
C5orf25	tomato4
C5orf27	slateblue3
C5orf28	red
C5orf30	lightcyan
C5orf32	purple
C5orf33	mediumpurple4
C5orf34	orange
C5orf35	paleturquoise
C5orf36	deeppink1
C5orf37	tan
C5orf39	slateblue3
C5orf4	white
C5orf41	slateblue3
C5orf42	brown1
C5orf44	palevioletred2
C5orf46	lightblue3
C5orf49	darkseagreen1
C5orf5	paleturquoise4
C5orf51	wheat1
C5orf53	slateblue3
C5orf54	moccasin
C5orf56	lightcyan
C5orf62	slateblue3
C6	darkgoldenrod1
C6orf1	lightpink2
C6orf100	indianred
C6orf103	lightpink2
C6orf105	saddlebrown
C6orf106	antiquewhite2
C6orf108	lightslateblue
C6orf111	salmon2
C6orf114	aliceblue
C6orf115	skyblue3
C6orf12	firebrick4
[truncated: 17,978 more rows]
